# Supplementary material
Source: PubMed Central journal article supplement (PMC3243532)

## Supplemental Data

### RB1CC1 suppresses type II collagen synthesis in chondrocytes, and causes dwarfism

Ichiro Nishimura<sup>1,2,\*</sup>, Tokuhiko Chano<sup>1,\*</sup>, Hiroko Kita<sup>1</sup>, Yoshitaka Matsusue<sup>2</sup>, and Hidetoshi Okabe<sup>1</sup>

Departments of <sup>1</sup>Clinical Laboratory Medicine, and <sup>2</sup>Orthopaedic Surgery, Shiga University of Medical Science, Tsukinowa-cho, Seta, Otsu, Shiga 520-2192, Japan.

**Supplemental Figure 1.** Col2-RB1CC1 causes dwarfism in mice.

**A.** Col2-RB1CC1 (*RB1CC1/Cre*) mice had lower body weights than the other types (*RB1CC1/wt*, *wt/Cre* and *wt/wt*) of mice. Horizontal numbers indicate mouse ages (weeks old: wo). **B & C.** *RB1CC1/Cre* mice (24 wo) had significantly shorter tibial (B) and cranio-sacral (C) lengths than the other types. The values indicate the means from both #44 and #84 of transgenic *CAG-floxed-Neo-RB1CC1* mouse lines. One-way factorial ANOVA and multiple comparison tests accompanied by Scheffe's significance were used to evaluate the relationships between genotypes and body sizes (\*;  $p < 0.05$ , statistically significant).

**Supplemental Figure 2.** RB1CC1 cannot inhibit synthesis of aggrecan, COMP and sGAG, but that of type II collagen.

**A.** ATDC5 cells were differentiated to chondrocytes for 0-96 hr after the transduction of *RB1CC1* cDNA or the empty vector *control* (1 $\mu$ g/well), and the lysates were analyzed by Western blots with the indicated antibodies. D & numbers indicate hours fed by the differentiation medium. Pre-Diff: pre-transduced ATDC5. D96 cont: non-transduced & 96 hr differentiated ATDC5. **B.** The sulfated glycosaminoglycan (sGAG) amount in culture medium of 96 hr differentiated ATDC5 chondrocytic cells was not significantly changed irrespective of *RB1CC1* cDNA transduction (0-2 $\mu$ g/well). The means  $\pm$  standard errors were from quadruplicate experiments, and were statistically analyzed by the Kruskal-Wallis test ( $p=0.401$ ).

**Supplemental Figure 3.** Activated NF $\kappa$ B or accumulated p62/SQSTM1 cannot be detected in Col2-RB1CC1 mice.

Neither phosphorylated NF $\kappa$ B (536) nor p62/SQSTM1 was detected in the chondrocytes of d18.5 *RB1CC1/Cre* and *wt/wt* embryos. Scale bar: 100 $\mu$ m.

# Supplemental Figure 1

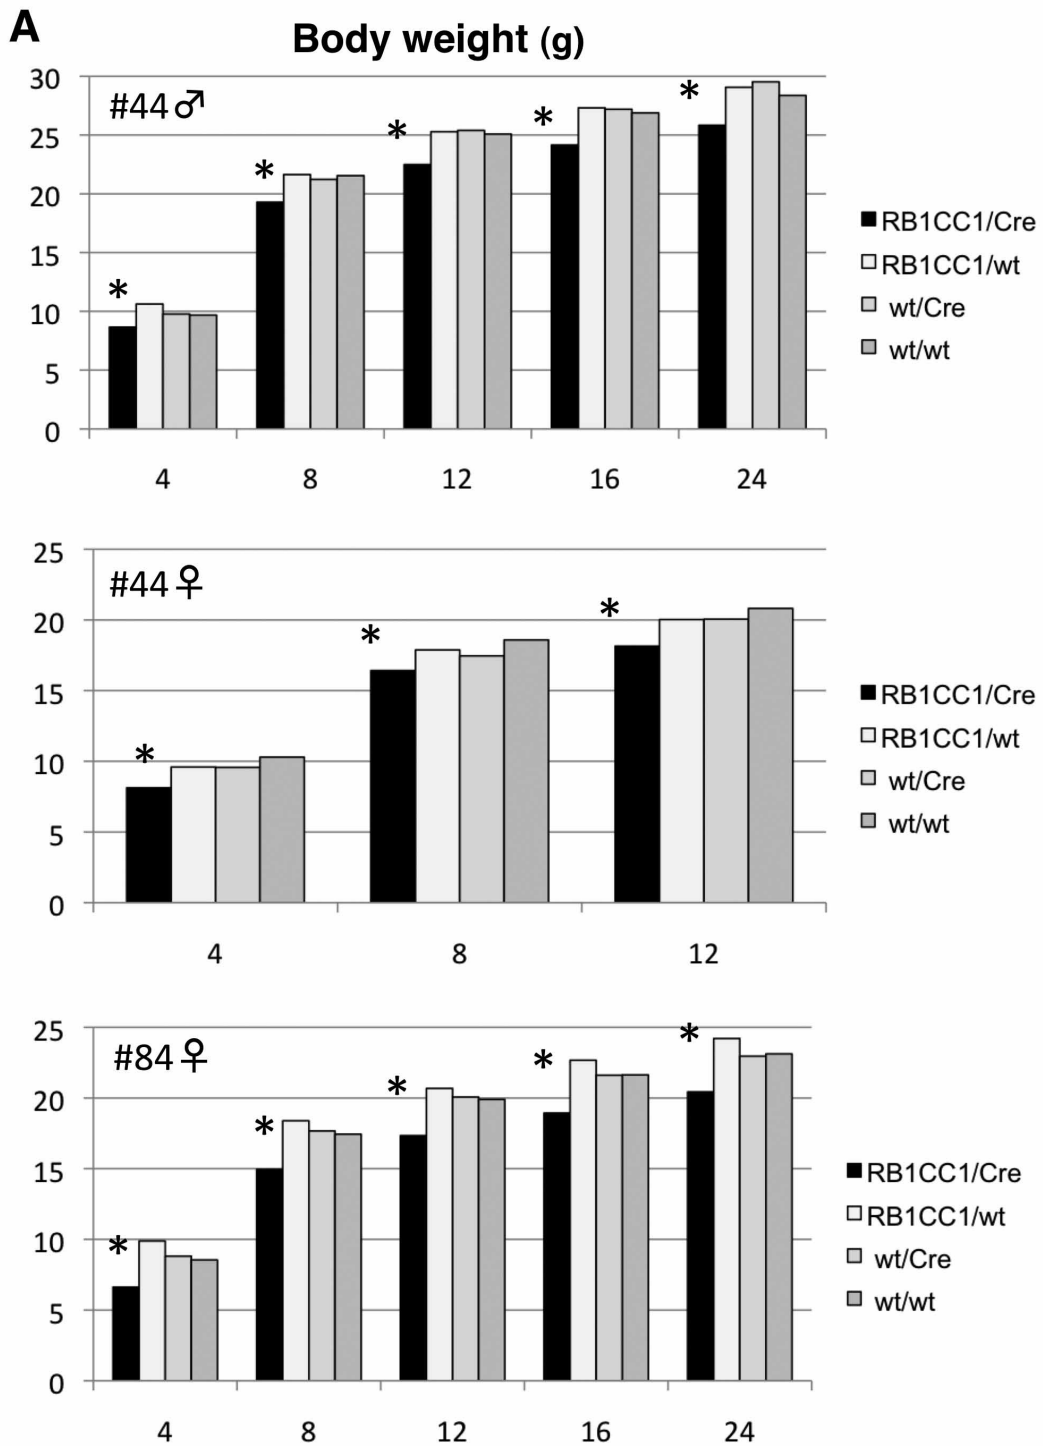

## Supplemental Figure 1

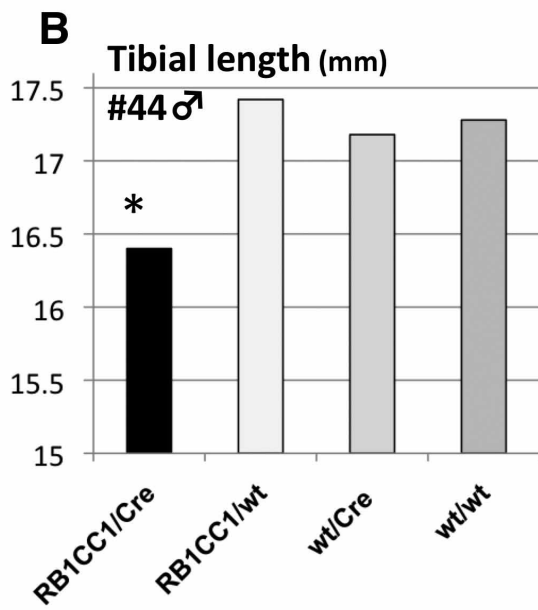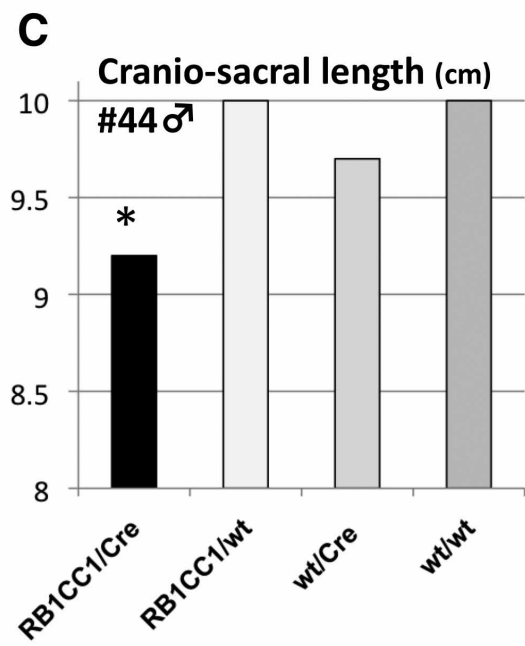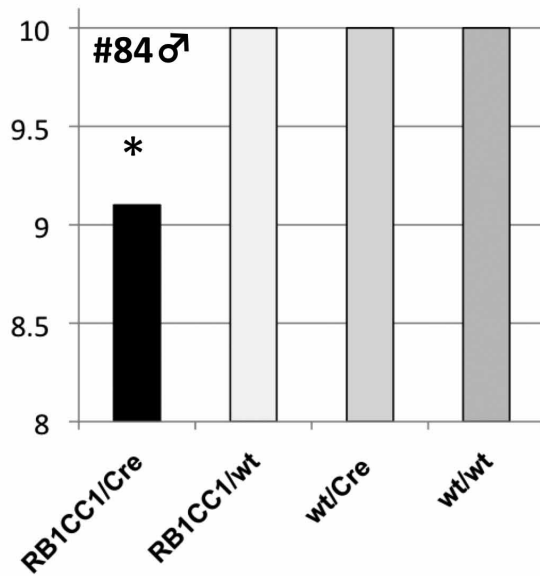

## Supplemental Figure 2

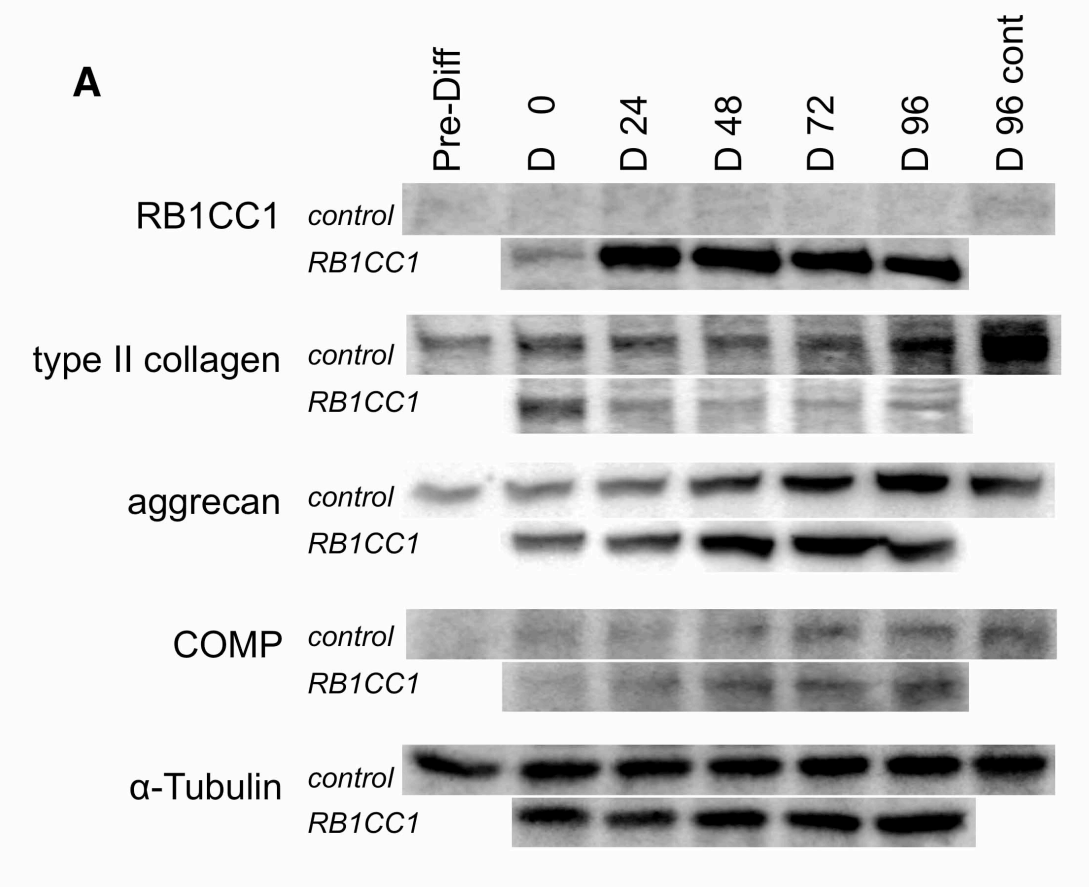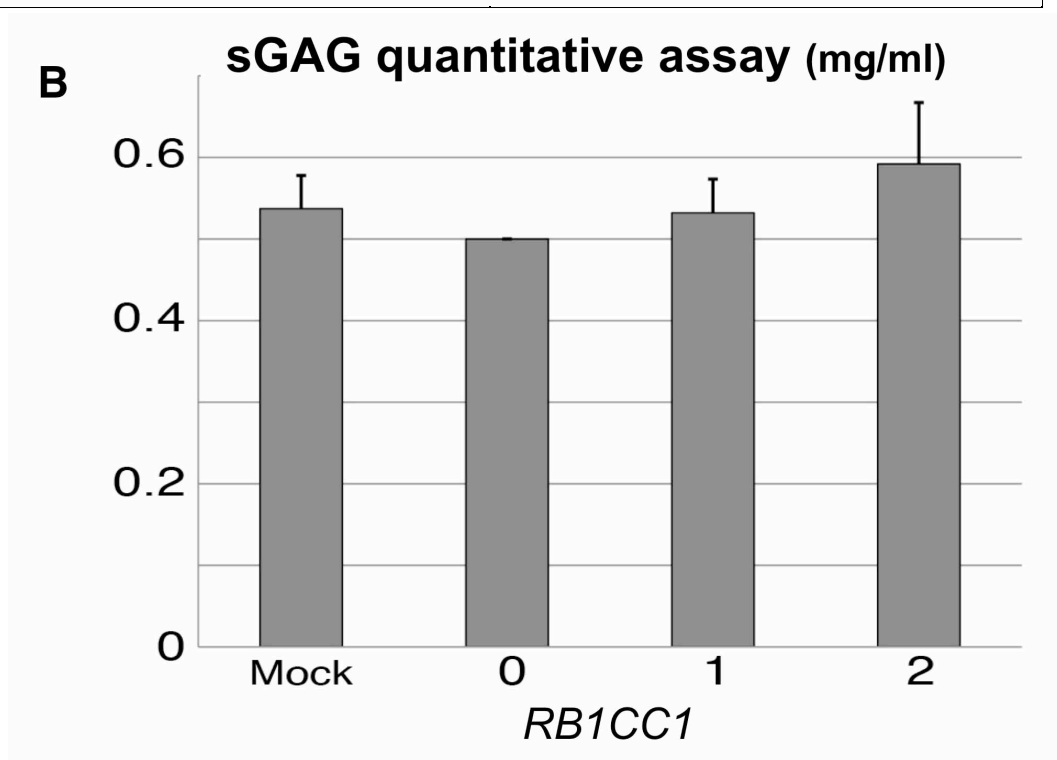

### Supplemental Figure 3

**RB1CC1/Cre**

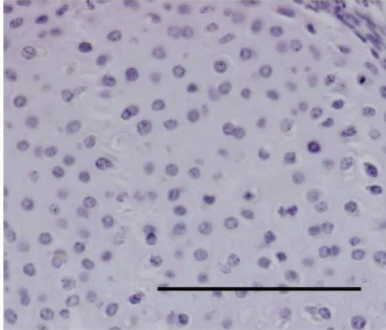

**pNFkB(536)**

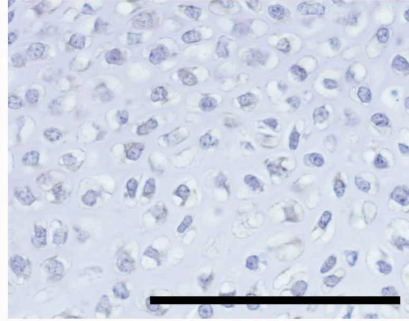

**p62/SQSTM1**

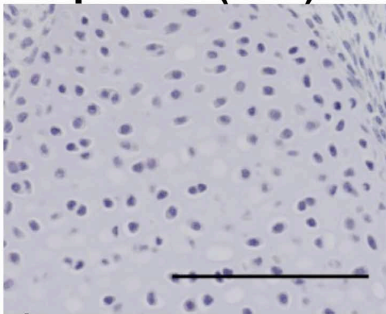

**wt/wt**

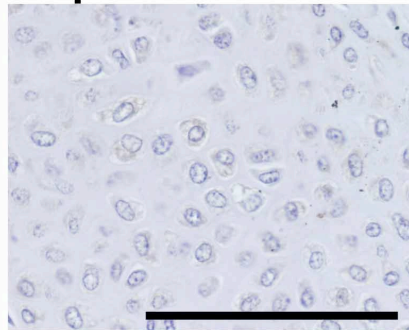

Supplement: supp_M111.264192_jbc.M111.264192-1.pdf [file supp_M111.264192_jbc.M111.264192-1.pdf]
